# Supplementary material for: Ferroelectric polymer tuned two dimensional layered MoTe2 photodetector
Source: Royal Society of Chemistry journal article supplement (doi:10.1039/c6ra18238k), 2016-01-01
Supplement: c6ra18238k1.pdf [file c6ra18238k1.pdf]

## Supporting Information of

### “Ferroelectric Polymer Tuned Two Dimensional Layered MoTe<sub>2</sub> Photodetector”

*Hai Huang<sup>1,2</sup>, Xudong Wang<sup>1</sup>, Peng Wang<sup>1</sup>, Guangjian Wu<sup>1,2</sup>, Yan Chen<sup>1,2</sup>, Caimin Meng<sup>1</sup>, Lei Liao<sup>3</sup>, Jianlu Wang<sup>1,2\*</sup>, Weida Hu<sup>1,2\*</sup>, Hong Shen<sup>1,2</sup>, Tie Lin<sup>1,2</sup>, Jinglan Sun<sup>1,2</sup>, Xiangjian Meng<sup>1,2</sup>, Xiaoshuang Chen<sup>1,2</sup>, Junhao Chu<sup>1,2</sup>*

<sup>1</sup>National Laboratory for Infrared Physics, Shanghai Institute of Technical Physics, Chinese Academy of Sciences, 500 Yu Tian Road, Shanghai 200083, China

<sup>2</sup>University of Chinese Academy of Sciences, 19 Yuquan Road, Beijing 100049, China

<sup>3</sup>Department of Physics and Key Laboratory of Artificial Micro- and Nano-Structures of Ministry of Education, Wuhan University, Wuhan 430072, China

\*Corresponding authors:

J. W. (email: [jlwang@mail.sitp.ac.cn](mailto:jlwang@mail.sitp.ac.cn)),

W. H. (email: [wdhu@mail.sitp.ac.cn](mailto:wdhu@mail.sitp.ac.cn)),

## Contents

1. The gate-source current ( $I_{gs}$ ) of the P(VDF-TrFE) topgate MoTe<sub>2</sub> phototransistor.

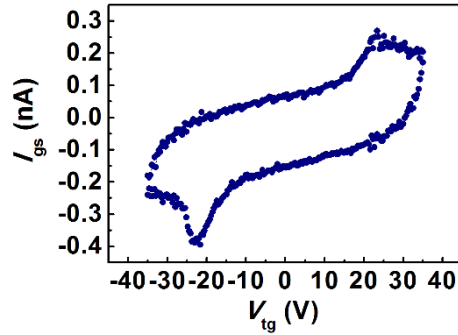

**Fig. S1.** The  $I_{gs}$ - $V_{tg}$  curves for the P(VDF-TrFE) topgate MoTe<sub>2</sub> phototransistor. It has a fairly low leakage current under high gate voltage. And two peaks appeared at  $\pm 23$  V, which correspond to the polarization switching current of ferroelectric P(VDF-TrFE).

2. The gate voltage dependent field effect mobility of P(VDF-TrFE) topgate MoTe<sub>2</sub> phototransistor.

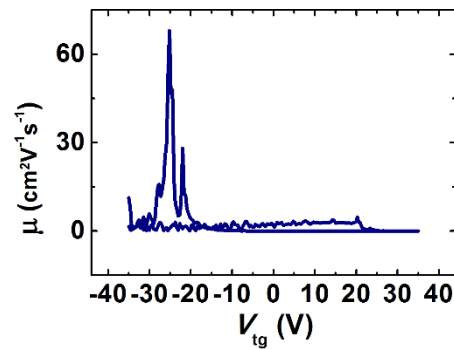

**Fig. S2.** The mobility of P(VDF-TrFE) topgate MoTe<sub>2</sub> phototransistor as a function of the gate voltage. It has a maximum value of 68 cm<sup>2</sup>V<sup>-1</sup>s<sup>-1</sup> when the gate voltage is at approximately -25 V.
